# Supplementary material for: Online monitoring of atmospheric krypton-85 with hourly time resolution
Source: Royal Society of Chemistry journal article supplement (doi:10.1039/d2ja00318j), 2023-01-01
Supplement: d2ja00318j1.pdf [file d2ja00318j1.pdf]

Table 1 Kr enrichment factor and Kr recovery at different cryogenic distillation temperatures. (Related to Fig. 2)

| Temperature (K) | Kr recovery % |
|-----------------|---------------|
| 83              | 90.9          |
| 108             | 60.0          |
| 109             | 52.8          |
| 110             | 37.9          |
| 112             | 27.3          |

| Temperature (K) | Kr enrichment factor | Error |
|-----------------|----------------------|-------|
| 83              | 26.1                 | 1.6   |
| 103             | 75.5                 | 4.5   |
| 105             | 48.0                 | 2.9   |
| 107             | 95.3                 | 5.7   |
| 108             | 181.9                | 10.9  |
| 109             | 144.0                | 8.6   |
| 111             | 179.7                | 10.8  |
| 113             | 145.7                | 8.7   |

Table 2 Two gas chromatography cycles monitored by the QMS. (Related to Fig. 3)

| Time (min) | He (Torr) | N <sub>2</sub> (Torr) | O <sub>2</sub> (Torr) | Ar (Torr) | Kr (Torr) | CH <sub>4</sub> (Torr) |
|------------|-----------|-----------------------|-----------------------|-----------|-----------|------------------------|
| 0          | 5.77E-08  | 2.54E-08              | 5.90E-09              | 5.66E-10  | 5.97E-12  | 1.36E-09               |
| 0.26742    | 2.65E-07  | 5.15E-07              | 1.44E-07              | 7.28E-09  | 1.22E-11  | 7.03E-09               |
| 0.53485    | 2.00E-07  | 4.29E-07              | 7.42E-08              | 4.04E-09  | 1.18E-11  | 5.77E-09               |
| 0.8023     | 1.68E-07  | 1.68E-07              | 2.93E-08              | 1.93E-09  | 4.11E-11  | 4.34E-09               |
| 1.06972    | 1.75E-07  | 2.65E-07              | 3.10E-08              | 2.40E-09  | 6.94E-11  | 4.69E-09               |
| 1.33713    | 1.83E-07  | 3.64E-07              | 3.32E-08              | 2.95E-09  | 7.45E-11  | 4.57E-09               |
| 1.60457    | 1.82E-07  | 3.13E-07              | 3.10E-08              | 2.59E-09  | 5.14E-11  | 4.52E-09               |
| 1.872      | 1.75E-07  | 1.83E-07              | 2.79E-08              | 2.27E-09  | 3.33E-11  | 4.33E-09               |
| 2.13942    | 1.70E-07  | 1.22E-07              | 2.60E-08              | 2.13E-09  | 2.29E-11  | 5.04E-09               |
| 2.40683    | 1.66E-07  | 9.84E-08              | 2.49E-08              | 1.95E-09  | 1.47E-11  | 5.70E-09               |
| 2.67427    | 1.64E-07  | 8.95E-08              | 2.36E-08              | 1.92E-09  | 1.26E-11  | 5.78E-09               |
| 2.94168    | 1.60E-07  | 8.50E-08              | 2.27E-08              | 1.98E-09  | 1.05E-11  | 5.49E-09               |
| 3.2091     | 1.57E-07  | 8.22E-08              | 2.14E-08              | 1.72E-09  | 1.03E-11  | 4.66E-09               |
| 3.47652    | 1.52E-07  | 7.96E-08              | 2.09E-08              | 1.76E-09  | 9.16E-12  | 3.98E-09               |
| 3.74393    | 1.48E-07  | 7.77E-08              | 2.04E-08              | 1.93E-09  | 9.18E-12  | 3.28E-09               |
| 4.01137    | 1.46E-07  | 7.63E-08              | 1.92E-08              | 1.65E-09  | 8.65E-12  | 3.33E-09               |
| 4.2788     | 1.44E-07  | 7.51E-08              | 1.89E-08              | 1.44E-09  | 8.70E-12  | 3.06E-09               |
| 4.54622    | 1.40E-07  | 7.53E-08              | 1.83E-08              | 2.06E-09  | 7.93E-12  | 2.85E-09               |
| 4.81362    | 1.33E-07  | 7.01E-08              | 1.68E-08              | 1.40E-09  | 7.91E-12  | 2.69E-09               |
| 5.08103    | 1.31E-07  | 6.43E-08              | 1.53E-08              | 1.17E-09  | 7.82E-12  | 2.70E-09               |
| 5.34843    | 1.28E-07  | 6.02E-08              | 1.48E-08              | 1.26E-09  | 7.92E-12  | 2.95E-09               |
| 5.61585    | 1.27E-07  | 5.98E-08              | 1.46E-08              | 1.41E-09  | 8.11E-12  | 2.73E-09               |

|          |          |          |          |          |          |          |
|----------|----------|----------|----------|----------|----------|----------|
| 5.88328  | 1.25E-07 | 5.82E-08 | 1.38E-08 | 1.29E-09 | 7.91E-12 | 2.67E-09 |
| 6.1507   | 1.24E-07 | 5.89E-08 | 1.34E-08 | 1.44E-09 | 8.01E-12 | 2.54E-09 |
| 6.41813  | 1.21E-07 | 5.71E-08 | 1.33E-08 | 1.56E-09 | 7.93E-12 | 2.90E-09 |
| 6.68553  | 1.18E-07 | 5.84E-08 | 1.32E-08 | 1.22E-09 | 8.43E-12 | 2.82E-09 |
| 6.95297  | 1.18E-07 | 5.55E-08 | 1.28E-08 | 1.65E-09 | 8.00E-12 | 3.08E-09 |
| 7.2204   | 1.16E-07 | 5.63E-08 | 1.27E-08 | 1.31E-09 | 7.80E-12 | 2.60E-09 |
| 7.48785  | 1.15E-07 | 5.74E-08 | 1.24E-08 | 1.31E-09 | 8.71E-12 | 2.47E-09 |
| 7.75528  | 1.13E-07 | 5.75E-08 | 1.24E-08 | 1.17E-09 | 8.33E-12 | 2.57E-09 |
| 8.0227   | 1.12E-07 | 5.64E-08 | 1.19E-08 | 1.19E-09 | 8.60E-12 | 2.94E-09 |
| 8.29013  | 1.11E-07 | 5.64E-08 | 1.22E-08 | 1.51E-09 | 7.55E-12 | 2.64E-09 |
| 8.55757  | 1.11E-07 | 5.47E-08 | 1.17E-08 | 1.21E-09 | 8.32E-12 | 2.27E-09 |
| 8.825    | 1.11E-07 | 5.38E-08 | 1.16E-08 | 1.31E-09 | 8.19E-12 | 2.49E-09 |
| 9.09242  | 1.08E-07 | 5.59E-08 | 1.13E-08 | 1.25E-09 | 7.97E-12 | 2.19E-09 |
| 9.35983  | 1.07E-07 | 5.37E-08 | 1.13E-08 | 1.45E-09 | 8.16E-12 | 2.37E-09 |
| 9.62725  | 1.07E-07 | 5.33E-08 | 1.10E-08 | 1.10E-09 | 7.84E-12 | 2.06E-09 |
| 9.89465  | 1.07E-07 | 5.28E-08 | 1.08E-08 | 1.15E-09 | 7.42E-12 | 2.57E-09 |
| 10.1621  | 1.07E-07 | 5.23E-08 | 1.08E-08 | 1.20E-09 | 7.74E-12 | 2.39E-09 |
| 10.42952 | 1.03E-07 | 5.10E-08 | 1.49E-08 | 1.73E-09 | 7.50E-12 | 2.26E-09 |
| 10.69697 | 1.05E-07 | 5.24E-08 | 2.72E-08 | 2.13E-09 | 8.03E-12 | 2.56E-09 |
| 10.96442 | 1.04E-07 | 5.20E-08 | 1.80E-08 | 1.66E-09 | 8.12E-12 | 2.40E-09 |
| 11.23187 | 1.02E-07 | 5.12E-08 | 1.31E-08 | 1.41E-09 | 7.94E-12 | 2.97E-09 |
| 11.4993  | 1.00E-07 | 5.04E-08 | 1.14E-08 | 1.33E-09 | 7.92E-12 | 2.24E-09 |
| 11.76677 | 1.02E-07 | 5.15E-08 | 1.09E-08 | 1.18E-09 | 7.88E-12 | 2.18E-09 |
| 12.03427 | 1.00E-07 | 5.29E-08 | 9.93E-09 | 1.02E-09 | 8.12E-12 | 2.35E-09 |
| 12.3017  | 1.00E-07 | 2.31E-07 | 1.06E-08 | 9.61E-10 | 7.64E-12 | 2.07E-09 |
| 12.5691  | 1.01E-07 | 3.86E-07 | 1.09E-08 | 1.27E-09 | 8.27E-12 | 2.31E-09 |
| 12.83652 | 9.87E-08 | 2.22E-07 | 1.07E-08 | 1.19E-09 | 7.88E-12 | 2.00E-09 |
| 13.10392 | 9.82E-08 | 1.15E-07 | 1.04E-08 | 1.17E-09 | 7.37E-12 | 2.00E-09 |
| 13.37135 | 9.69E-08 | 7.58E-08 | 9.76E-09 | 8.69E-10 | 7.31E-12 | 2.41E-09 |
| 13.6388  | 9.76E-08 | 6.08E-08 | 9.66E-09 | 1.03E-09 | 7.77E-12 | 1.95E-09 |
| 13.90622 | 9.71E-08 | 5.50E-08 | 9.48E-09 | 9.45E-10 | 7.95E-12 | 1.83E-09 |
| 14.17367 | 9.47E-08 | 5.22E-08 | 9.15E-09 | 1.29E-09 | 2.41E-11 | 2.00E-09 |
| 14.44108 | 8.71E-08 | 4.47E-08 | 8.38E-09 | 1.14E-09 | 6.48E-11 | 1.94E-09 |
| 14.70853 | 9.66E-08 | 5.19E-08 | 9.43E-09 | 1.22E-09 | 7.41E-11 | 2.32E-09 |
| 14.97593 | 9.82E-08 | 5.03E-08 | 9.81E-09 | 1.19E-09 | 4.31E-11 | 1.93E-09 |
| 15.24337 | 9.74E-08 | 5.17E-08 | 9.33E-09 | 1.43E-09 | 2.30E-11 | 1.97E-09 |
| 15.5108  | 9.75E-08 | 5.08E-08 | 9.34E-09 | 1.02E-09 | 1.50E-11 | 2.24E-09 |
| 15.77823 | 9.66E-08 | 5.03E-08 | 8.99E-09 | 9.11E-10 | 1.08E-11 | 2.80E-09 |
| 16.04567 | 9.63E-08 | 4.99E-08 | 9.38E-09 | 1.43E-09 | 9.22E-12 | 4.02E-09 |
| 16.3131  | 9.61E-08 | 4.90E-08 | 9.03E-09 | 1.21E-09 | 8.77E-12 | 4.03E-09 |
| 16.58053 | 9.55E-08 | 4.83E-08 | 8.78E-09 | 7.35E-10 | 8.93E-12 | 2.72E-09 |
| 16.84795 | 9.67E-08 | 4.73E-08 | 8.68E-09 | 1.02E-09 | 8.10E-12 | 2.31E-09 |
| 17.11538 | 9.47E-08 | 4.87E-08 | 8.63E-09 | 7.79E-10 | 7.71E-12 | 1.93E-09 |
| 17.3828  | 9.49E-08 | 4.70E-08 | 8.61E-09 | 1.07E-09 | 6.73E-12 | 1.72E-09 |

Table 3 Results of the online monitoring experiment of atmospheric  $^{85}\text{Kr}$  activities.  
(Related to Fig. 4)

| Number                                    | Time            | $^{85}\text{Kr}$ activity<br>(dpm/cc) | Error<br>(dpm/cc) | Volume ( $\mu\text{L}$ ) | Corrected $^{85}\text{Kr}$<br>(dpm/cc) | Corrected Error<br>(dpm/cc) |
|-------------------------------------------|-----------------|---------------------------------------|-------------------|--------------------------|----------------------------------------|-----------------------------|
| 1                                         | 2020/8/17 8:24  | 77.35                                 | 2.2               | 1.34                     | 77.35                                  | 2.20                        |
| 2                                         | 2020/8/17 9:53  | 77.62                                 | 2.13              | 1.44                     | 77.80                                  | 3.83                        |
| 3                                         | 2020/8/17 11:15 | 80.19                                 | 2.2               | 1.32                     | 81.96                                  | 3.88                        |
| 4                                         | 2020/8/17 12:37 | 50.31                                 | 1.73              | 0.98                     | 31.68                                  | 1.84                        |
| 5                                         | 2020/8/17 13:58 | 78.4                                  | 2.39              | 1                        | 83.15                                  | 4.28                        |
| 6                                         | 2020/8/17 15:20 | 76.82                                 | 2.73              | 0.37                     | 79.07                                  | 4.71                        |
| 7                                         | 2020/8/17 16:44 | 80.6                                  | 2.35              | 1.2                      | 85.10                                  | 4.18                        |
| 8                                         | 2020/8/17 18:06 | 82.18                                 | 2.42              | 0.96                     | 86.62                                  | 4.29                        |
| 9                                         | 2020/8/17 19:28 | 64.42                                 | 2.24              | 0.43                     | 56.45                                  | 3.28                        |
| 10                                        | 2020/8/17 21:04 | 69.71                                 | 2.51              | 0.43                     | 66.02                                  | 3.97                        |
| 11                                        | 2020/8/17 23:18 | 80.52                                 | 2.4               | 0.94                     | 84.24                                  | 4.20                        |
| 12                                        | 2020/8/18 0:39  | 75.47                                 | 2.19              | 1.12                     | 75.21                                  | 3.65                        |
| 13                                        | 2020/8/18 2:04  | 77.77                                 | 2.14              | 1.34                     | 79.13                                  | 3.65                        |
| 14                                        | 2020/8/18 3:26  | 77.31                                 | 2.15              | 1.01                     | 78.13                                  | 3.64                        |
| 15                                        | 2020/8/18 5:00  | 52.26                                 | 1.63              | 1                        | 36.50                                  | 1.90                        |
| 16                                        | 2020/8/18 6:10  | 76.14                                 | 2.23              | 1.4                      | 78.15                                  | 3.82                        |
| 17                                        | 2020/8/18 7:50  | 78.22                                 | 2.18              | 2.47                     | 81.04                                  | 3.78                        |
| 18                                        | 2020/8/18 11:18 | 62.82                                 | 1.96              | 1.13                     | 54.77                                  | 2.86                        |
| 19                                        | 2020/8/18 13:37 | 76.62                                 | 2.32              | 1.47                     | 78.58                                  | 3.97                        |
| 20                                        | 2020/8/18 15:00 | 78.9                                  | 2.31              | 1.68                     | 82.00                                  | 4.01                        |
| Weekly averaged $^{85}\text{Kr}$ (dpm/cc) |                 | 77.85 $\pm$ 1.98                      |                   |                          |                                        |                             |
